# Supplementary material for: Error Analysis of Deep Sequencing of Phage Libraries: Peptides Censored in Sequencing
Source: PubMed Central journal article supplement (PMC3876701; doi:10.1155/2013/491612), 2013-12-12
Supplement: 491612.f1.pdf [file 491612.f1.pdf]

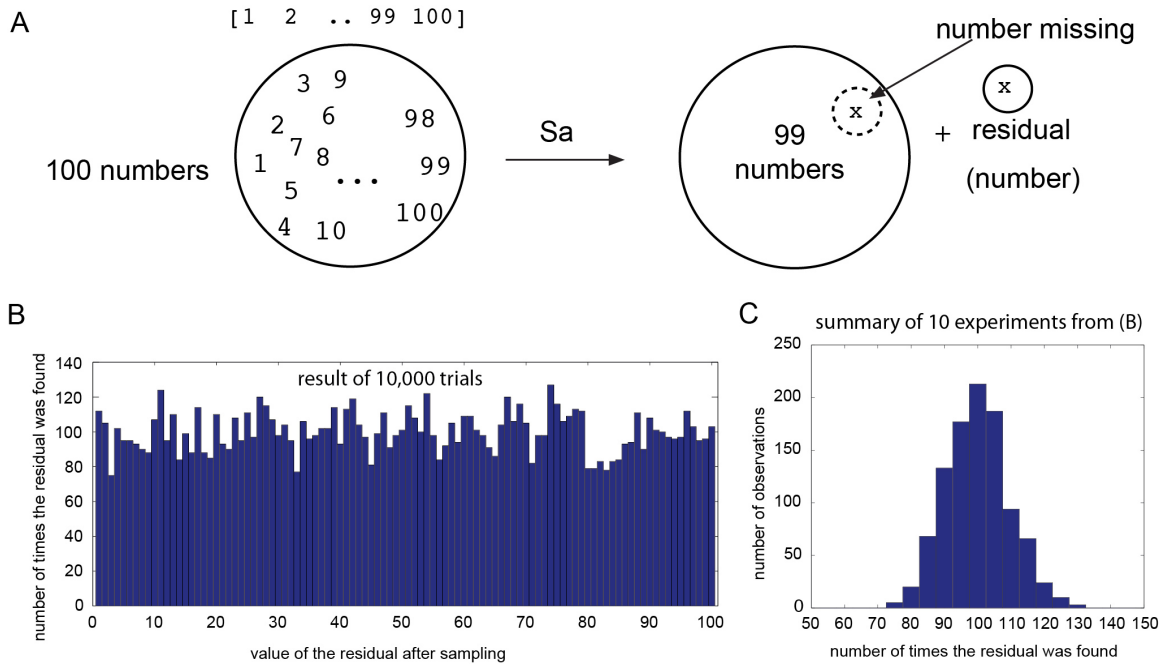

Figure S1. Testing the performance of random indexing function.

```
% This script tests the random index generator function by looking at
% the distribution of residuals in 10 sets of 10,000 trials
```

```
X=[]; Y=[]; Nout=[];
```

```
for kk=1:10
    for i=1:10000
        X(i)=i;
        [~,Y(i)]=randN(99,100);
    end
    figure(1); % pannel B
    [nout] = hist(Y,0:1:100);
    hist(Y,1:1:100);
    figure(2); % pannel C
    Nout=[Nout nout];
end
```

```
function [out,residual] = randN(n,N)
% Generate random n integers from the set of N integers; n<N

    t2=0; out=[]; N1=1:1:N;

    while t2<n
        % generate random integers
        t1 = floor(random('unif',1, numel(N1)+1-1e-5, 1, n-t2));
        tU = unique(t1); % discard repeating elements
        out=[out N1(tU)]; % combine with previous elem.
        t2 = numel(out); % count current elements
        N1=setdiff(N1,N1(tU)); % remove the found elements
    end
    residual=N1;
end
```

Scheme S1. Matlab scripts of random indexing functions and scripts used to generate figure S1.

```

function [SaFre] = SA(Fre,n)
    % Generates a random sample of the frequency vector.

    [EX,U]= expand(Fre);          % Create an expanded multiset.
    IX    = randN(n,sum(Fre));    % Generate random index vector
    sFre  = EX(IX);              % Create random sample
    SaFre = fold(U,Fre,sFre);    % fold back to frequency form

end

function [out,residual] = randN(n,N)
% Generate random n integers from the set of N integers; n<N

    t2=0; out=[]; N1=1:1:N;

    while t2<n
        % generate random indices
        t1 = floor(random('unif',1, numel(N1)+1-1e-5, 1, n-t2));

        tU = unique(t1);          % discard repeating elements
        out=[out N1(tU)];         % combine with previous elem.
        t2 = numel(out);          % count current elements
        N1=setdiff(N1,N1(tU));    % remove the found elements
    end
    residual=N1;
end

function [EXP, U] = expand(Fre)
% Expand multiset from a frequency form
    EXP = zeros(1, sum(Fre));    % blank expanded multiset
    U = 1:1: numel(Fre);        % unique identifiers

    h = waitbar(0, '');
    binE=0;
    for i=1: numel(Fre)
        binE = binE+Fre(i);      % bin end
        binS = binE-Fre(i)+1;    % bin start
        EXP(binS:binE)=U(i);     % fill each bin
        if mod( i, round(numel(Fre)/100) )==0
            waitbar(i/numel(Fre),h,'converting multiset');
        end
    end
    delete(h);
end

function [SaFre] = fold(U,Fre,sFre)
% collapse the expanded multiset to frequency form.
    temp1 = sort(sFre, 'ascend');
    [found, temp2, ~] = unique(temp1, 'first');

    temp3    = [temp2(2:end); numel(temp1)+1];
    Occur = temp3-temp2;
    clear temp*

    [~,notfound] = setdiff(U,found);
    SaFre        = Fre;
    SaFre(notfound) = 0;
    SaFre(found)   = Occur;
end

```

Scheme S2. Implementation of sampling operator acting on Fre vector.

```

function [C] = confidint(Fre,n,nn)
% Generates a confidence interval of the sampling operator
% Frequency vector must be Nx1 if not, transpose it
if size(Fre,1)~=1
    if size(Fre,2)==1
        Fre=Fre';
        TRANSPOSE=1;
    else
        error('vector must be Nx1 or 1xN !! ');
    end
else
    TRANSPOSE=0;
end

[EX,U]= expand(Fre);          % Create an expanded multiset.

Ave = round(Fre*(n/sum(Fre)));
C   = [Ave; Ave];           % seed using average values
MAX = find(Fre==max(Fre));
M   = num2str(Ave(MAX));

% repeat sampling nn times
hh = waitbar(0,'1','Name',['Calculating confidence interval'...
    'in ' num2str(nn) ' steps'],...
    'CreateCancelBtn','setappdata(gcf,'canceling',1)');

for kk=1:nn
    if getappdata(hh,'canceling')
        break
    end

    IX   = randN(n,sum(Fre)); % Random index vector
    sFre = EX(IX);           % Create random sample
    SaFre = fold(U,Fre,sFre); % Fold to frequency form

    C(1, SaFre<C(1,:) ) = SaFre ( SaFre<C(1,:) );
    C(2, SaFre>C(2,:) ) = SaFre ( SaFre>C(2,:) );

    if mod(kk,round(nn/100))==0
        str = ['Interval for maximum value is [ '...
            num2str(C(1,MAX)) ' ...' M '... ' ...
            num2str(C(2,MAX)) ' ]'];
        waitbar(kk/nn,hh,sprintf('%c',str));
    end
end
delete(hh);

if TRANSPOSE C=C'; end
end

```

Scheme S3. Implementation of the operator that calculates confidence interval; scripts has rudimentary error check features and progress display (waitbar). Note that this implementation required `randN`, `expand` and `fold` functions (see Scheme S2 for code)

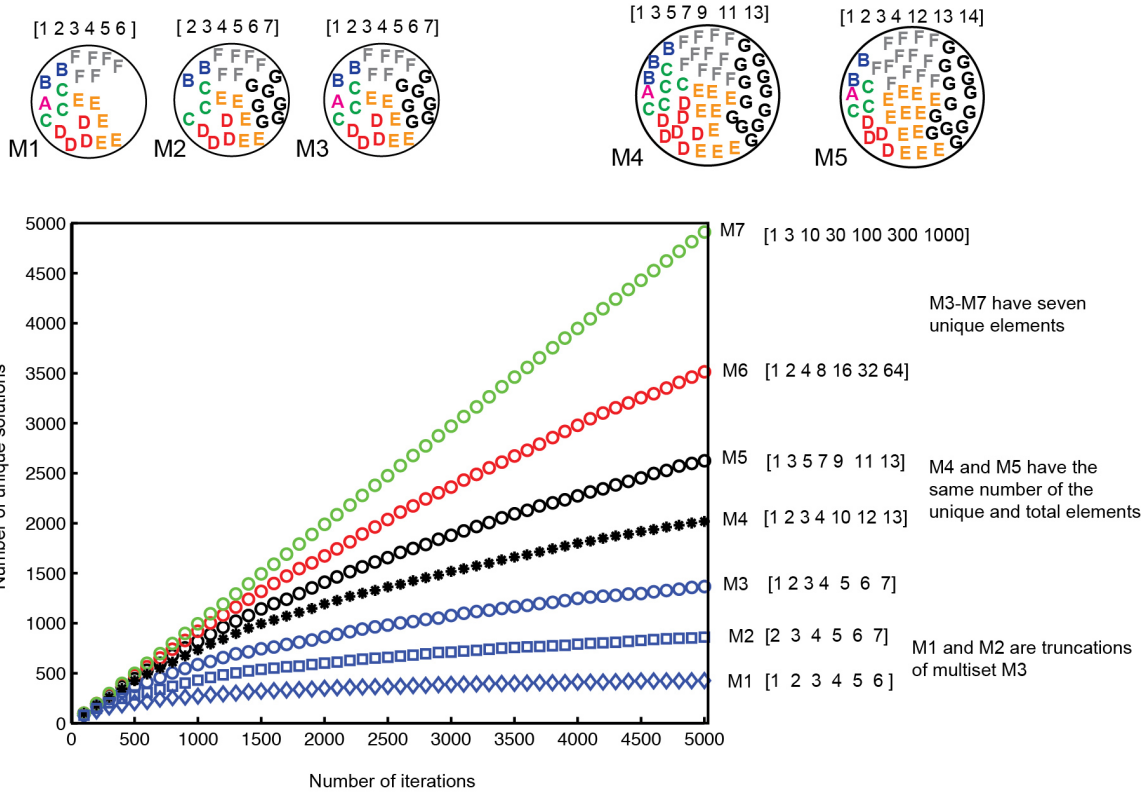

**Figure S2.** Estimation of the total solutions for the  $Sa(M)$  operator, where  $M$  is a multiset, using rate of convergence. We examined several multisets that contain six or seven unique elements with different copy numbers (some are represented graphically). Number of unique solutions for the  $Sa$  operator depends on the unique and total size, as well as the internal structure of the multiset. For example,  $M4$  and  $M5$  have identical number of unique and total elements but different estimated number of  $Sa(M4)$  and  $Sa(M5)$ .

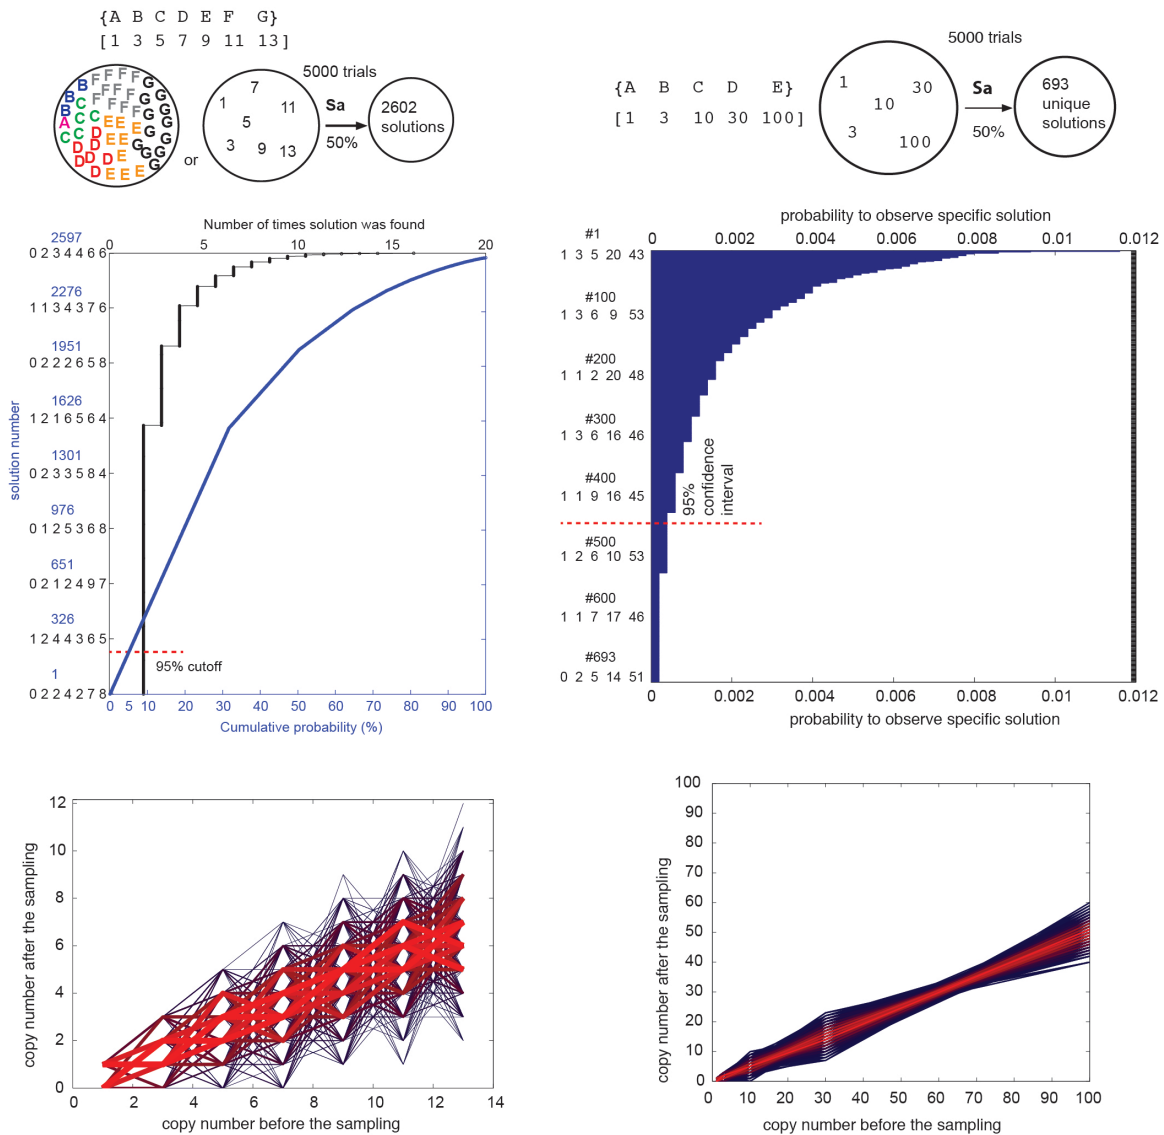

**Figure S3.** Properties of the  $Sa(M)$  solutions for multisets that have elements with very different copy numbers. Collections of probable solutions has biconcave or “pine cone” shape indicating that no solution contains more than one outlier point. While this property is true to sampling of any multiset, this property is easier to visualize in these “sparse” multisets.

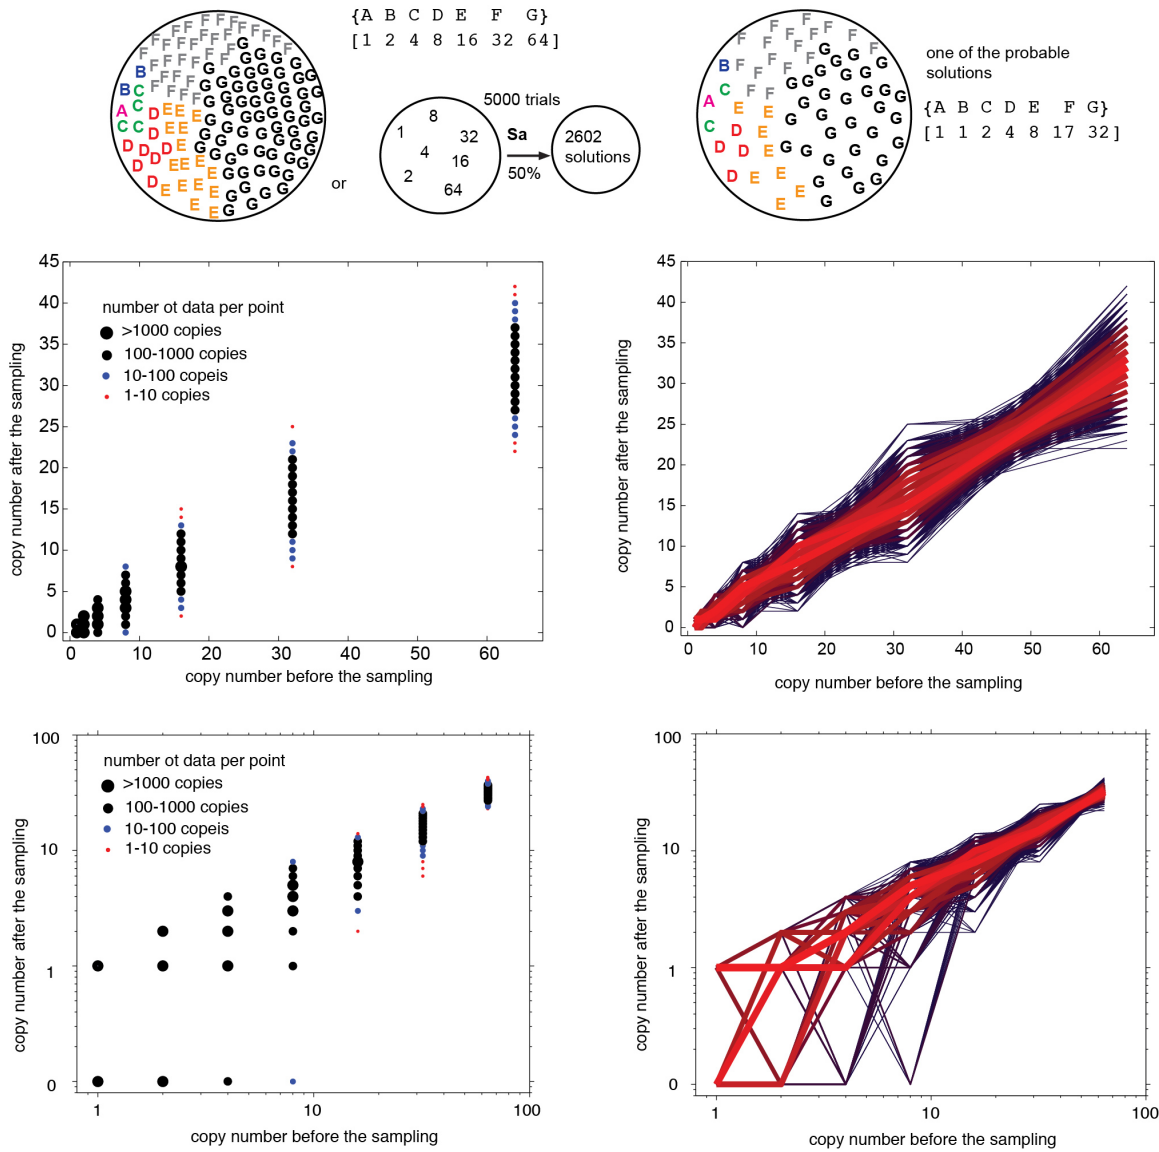

**Figure S4.** Visualization of the  $Sa(M)$  solutions for sparse multiset with  $[1\ 2\ 4\ 8\ 16\ 32\ 64]$  frequency vector on linear and log scale. Lines of different thickness (right) denote solutions found with different probability to find a specific vector, while dots of different size (left) denote probabilities of finding the individual frequencies in the vector. The “outlier frequencies” represented by blue dots describe  $>99\%$  confidence boundary of each frequency. These solutions have high confidence because they were found  $>10$  times in 5000 iterations. No solution in 5000 iterations connects two “outlier” frequencies. Blue outliers, thus, describe a region in which can be described as “1% of the solutions contains only one of the blue outliers”. Probability of finding the solution that contains exactly one red outlier is between 0.02% and 0.2%. The other frequencies in these improbable solutions reside in the “probable interval” (denoted by red lines).

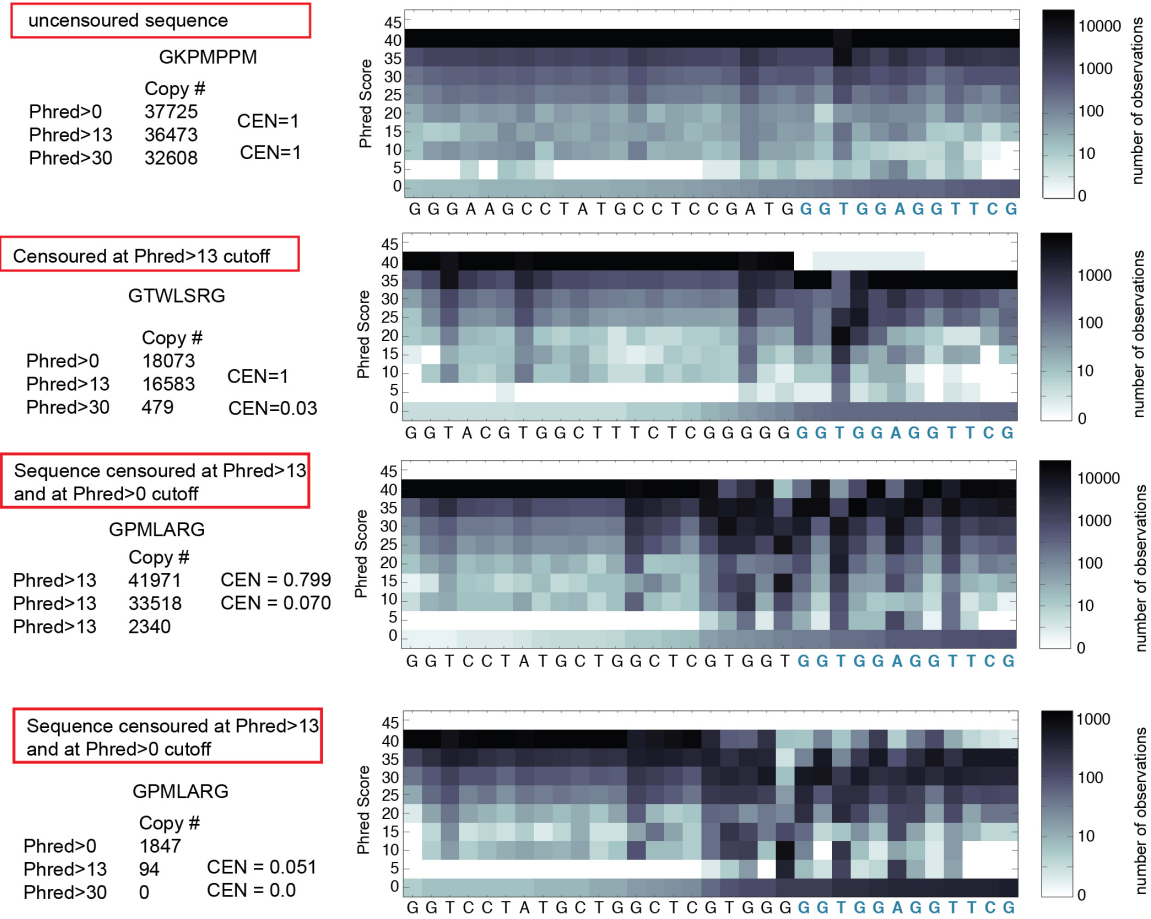

**Figure S5.** Distribution of errors in censored reads. In uncensored sequences (top) the errors occur at low abundance uniformly throughout the whole read. In censored reads, errors occur preferentially in 3-4 specific nucleotides.

| Nucleotide             | peptide        | <sup>13</sup> n | <sup>30</sup> n | <sup>10</sup> C | CEN          |
|------------------------|----------------|-----------------|-----------------|-----------------|--------------|
| GGTCCTATGCTGGCTCGTGGT  | <b>GPMLARG</b> | 33518           | 2340            | 24732           | <b>0.070</b> |
| GGTAAGGTGCAGGCGCAGTCCG | GKVOAQS        | 24566           | 13168           | 18101           | 0.536        |
| CAGCTGATGAATGCTTCGCGG  | QLMNASR        | 21821           | 10957           | 16070           | 0.502        |
| ATGCTGCCGTCTGTGCTTGAT  | MLPSVLD        | 17619           | 12446           | 12955           | 0.706        |
| GGTACGTGGCTTTCTCGGGGG  | GTWLSRG        | 16583           | 479             | 12154           | <b>0.029</b> |
| CAGAGTCCTGATGAGGTTTGG  | QSPDEVW        | 14482           | 8780            | 10615           | 0.606        |
| GCGACGCCGTCTGTGGTGGGCT | ATPSWWA        | 13658           | 8031            | 9997            | 0.588        |
| ACGACGCGTCTTCCGGTTATT  | TTRLPVI        | 11538           | 8063            | 8446            | 0.699        |
| GCGCGTCCGCTCTGTTTGGT   | ARPLFG         | 11436           | 7745            | 8371            | 0.677        |
| TGGCCTACGCTGCAGTGGGCG  | WPTLQWA        | 11097           | 5017            | 8112            | 0.452        |
| AGTCAGACGAAGGTGCCGTTG  | SQTKVPL        | 10129           | 6138            | 7380            | 0.606        |
| ACGCTGTTGCAGGCGGCTAGG  | <b>TLLQAAR</b> | 9819            | 2841            | 7144            | 0.289        |
| AATCAGCAGCCGGCTCCTCGG  | NQQPAPR        | 7634            | 5187            | 5566            | 0.679        |
| CGGCTTCCGTCTTGCCATGAG  | <b>RLPSWHE</b> | 7587            | 3867            | 5533            | 0.510        |
| GCTGCTAAGACGCCACGGAG   | <b>AAKPTPE</b> | 7468            | 2987            | 5442            | 0.400        |
| CTACCTTCATATCATGTGCCT  | <b>LPSYHVP</b> | 7410            | 4557            | 5394            | 0.615        |
| GATGCGGGTATGTGACTTTG   | <b>DAGYVTL</b> | 7410            | 4103            | 5394            | 0.554        |
| GCGACGACTGTTCCAGCTTCG  | ATTVPAS        | 7287            | 4514            | 5290            | 0.619        |
| AAGCTTCCTGGGTGGTCGGGG  | KLPGWSG        | 6832            | 340             | 4970            | <b>0.050</b> |
| GCGTCTACGTTGAAGTGGGCG  | ASTLKWA        | 6776            | 2279            | 4928            | 0.336        |
| AAGCCGGTTCAGCTGGATCAT  | KPVQLDH        | 6744            | 4687            | 4906            | 0.695        |
| GGGGAGACTCGTGCCCGCTT   | <b>GETRAPL</b> | 6680            | 4803            | 4850            | 0.719        |
| AATCCGATGCAGTCTCGTCCG  | NPMQSRP        | 5928            | 4135            | 4297            | 0.698        |
| TCGTATGCGTCCGAGAAGCGT  | SYASEKR        | 5804            | 3838            | 4221            | 0.661        |
| ACGCCGAGTGGCTGGTCAG    | <b>TPQWAGO</b> | 5602            | 3638            | 4063            | 0.649        |
| ACGCGGCTGGTCTGGATTTT   | TRAGLDF        | 5538            | 3275            | 4007            | 0.591        |
| CAGCGGCTGCCTCAGACGGCG  | <b>QRLPQTA</b> | 5483            | 2               | 3973            | <b>0.000</b> |
| TGGACTGGTTCGTATAGGTGG  | <b>WTGSYRW</b> | 5174            | 2239            | 3738            | 0.433        |
| CATCATGCGCTGCGTTTGGAG  | HHALRLE        | 4993            | 3196            | 3610            | 0.640        |

**Table S1.** Top 30 sequences censored during the <sup>13</sup>n → <sup>30</sup>n process. Bolded sequences could also be found in censorship during the <sup>1</sup>n → <sup>13</sup>n process (partially described in Table 2). Normal-font sequences are uniquely censored in <sup>13</sup>n → <sup>30</sup>n process. While typical censorship is a factor of two or three, the highlighted reads are censored by a factor of 10 or more.



| Nucleotide             | peptide        | <sup>13</sup> n | <sup>30</sup> n | <sup>10</sup> C | CEN          |
|------------------------|----------------|-----------------|-----------------|-----------------|--------------|
| GGTCCTATGCTGGCTCGTGTT  | <b>GPMLARG</b> | 41971           | 33518           | 38273           | 0.799        |
| CATGTGCTTCGTTTTGATACG  | <b>HVLRFDT</b> | 30513           | 27073           | 27804           | 0.887        |
| CATGTGAAGCCTCTGGTGACG  | <b>HVKPLVT</b> | 18102           | 16266           | 16451           | 0.899        |
| ACGCTGTTGCAGGCGGCTAGG  | <b>TLLOAAR</b> | 11108           | 9819            | 10095           | 0.884        |
| CAGCGGCTGCCTCAGACGGCG  | <b>ORLPQTA</b> | 10687           | 5483            | 9667            | 0.513        |
| CGGCTCCGTCTTGCCATGAG   | <b>RLPSWHE</b> | 8794            | 7587            | 7966            | 0.863        |
| GCTGCTAAGACGCCTACGGAG  | <b>AAKTPTE</b> | 8445            | 7468            | 7628            | 0.884        |
| CTACCTTCATATCATGTGCCT  | <b>LPSYHVP</b> | 8442            | 7410            | 7640            | 0.878        |
| GATGCGGGGTATGTGACTTTG  | <b>DAGYVTL</b> | 8241            | 7410            | 7452            | 0.899        |
| GGGGAGACTCGTGCCCGCTT   | <b>GETRAPL</b> | 7546            | 6680            | 6834            | 0.885        |
| CATGGGCTGTCTCATCGGCTT  | <b>HGLSHRL</b> | 6793            | 4034            | 6136            | 0.594        |
| ACGAGTCCCTCGGATTGCGCCT | <b>TSPRIAP</b> | 6370            | 5721            | 5761            | 0.898        |
| ACGCCCGAGTGGGCTGGTCAG  | <b>TPQWAGO</b> | 6244            | 5602            | 5641            | 0.897        |
| TGGACTGGTTCGTATAGGTGG  | <b>WTGSYRW</b> | 5839            | 5174            | 5267            | 0.886        |
| AGTCTGAGGCATGGGTCGTAT  | <b>SLRHGSY</b> | 5401            | 4425            | 4882            | 0.819        |
| TCGGTGGAGTCGGCGTGGAGG  | <b>SVESAWR</b> | 5104            | 4408            | 4604            | 0.864        |
| TCGCCTCATTTGCATGGGGCT  | <b>SPHLHGA</b> | 4674            | 4170            | 4219            | 0.892        |
| CTGGCGCGTGAGCCTACGTCG  | <b>LAREPTS</b> | 4215            | 3747            | 3800            | 0.889        |
| CATACGGTTCCGACTGGTGAG  | <b>HTVRTGE</b> | 4154            | 3617            | 3738            | 0.871        |
| TCGCGGACTTTGATTGCGCCG  | <b>SRTLIAP</b> | 3620            | 3236            | 3258            | 0.894        |
| GCGGCTGGTCAGCAGTTTCCT  | <b>AAGQQFP</b> | 3510            | 2790            | 3151            | 0.795        |
| GCGACGGGTTGGTCTGCGTTG  | <b>ATGWSAL</b> | 3477            | 3087            | 3131            | 0.888        |
| TCGGAGGCTGAGGCGACGTAT  | <b>SEAEATY</b> | 3389            | 3023            | 3039            | 0.892        |
| CATGTGTATGAGTTTGGGCCG  | <b>HVYFEGP</b> | 3311            | 2877            | 2977            | 0.869        |
| CTTGTGACGACGTGGCCGGCT  | <b>LVTTWPA</b> | 3116            | 2721            | 2787            | 0.873        |
| ACGGGTGTGACGCTTACGGTG  | <b>TGVTLTV</b> | 3111            | 2437            | 2791            | 0.783        |
| GAGTATCGGCTGCTTTATTCG  | <b>EYRLLYS</b> | 2968            | 1955            | 2666            | 0.659        |
| GCGGCTGGCAGCTTCATAGT   | <b>AAWQLHS</b> | 2801            | 2491            | 2515            | 0.889        |
| TCGGCTACTCAGGCTTCTGTG  | <b>SATQASV</b> | 2791            | 2356            | 2501            | 0.844        |
| CAGGAGCCGCTTCTGCTTTG   | <b>QEPLPAL</b> | 2492            | 2166            | 2237            | 0.869        |
| ACGGCGGGTATCCGTCGTGG   | <b>TARYPSW</b> | 2199            | 1959            | 1962            | 0.891        |
| AATACTGATGTTGCTGGTGGT  | <b>NTDVAGG</b> | 2180            | 1919            | 1944            | 0.880        |
| CAGGCGGGGCTTCTGCGTCAT  | <b>QAGLLRH</b> | 2149            | 1876            | 1922            | 0.873        |
| CGGGCTGATATGTCGACTGTG  | <b>RADMSTV</b> | 2098            | 1858            | 1878            | 0.886        |
| TGGGGGGGCTGCCTGAGCCT   | <b>WGGLPEP</b> | 2047            | 1591            | 1817            | 0.777        |
| GGTCCTATGCTGGCTCGTGTT  | <b>GPMLARG</b> | 1847            | 94              | 1646            | <b>0.051</b> |

**Table S2.** Top 30 sequences censored during the <sup>1</sup>n → <sup>13</sup>n process. Bolded sequences can also be found in censorship during the <sup>13</sup>n → <sup>30</sup>n process (partially described in Table 1). Red sequences are uniquely censored in <sup>1</sup>n → <sup>13</sup>n process.
